# Supplementary material
Source: PubMed Central journal article supplement (PMC4005977)

**Figure S1**

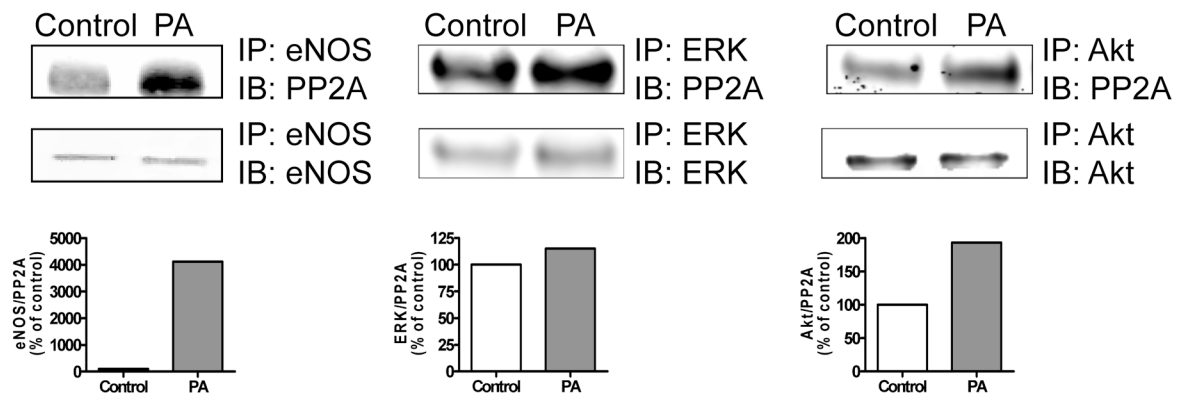

Supplement: mmc1.pdf [file mmc1.pdf]

Figure S2

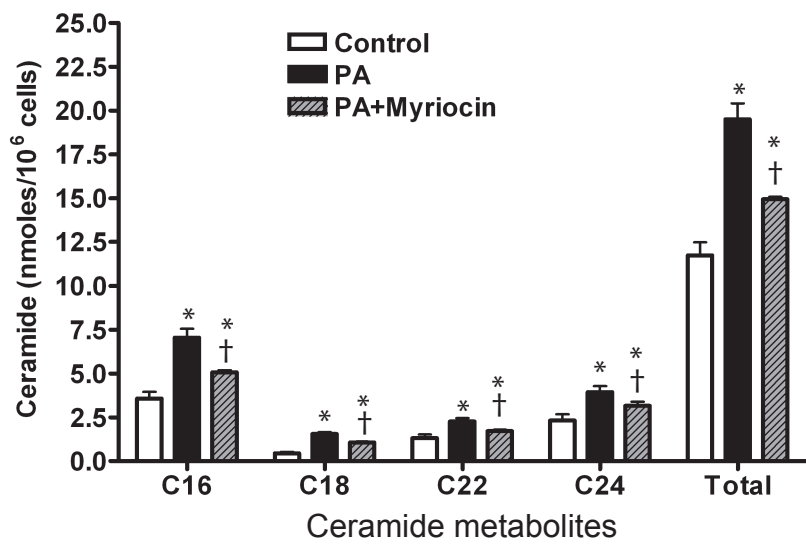

Supplement: mmc2.pdf [file mmc2.pdf]
